# Supplementary material
Source: Royal Society of Chemistry journal article supplement (doi:10.1039/d6nj01338d)
Supplement: d6nj01338d1.pdf [file d6nj01338d1.pdf]

## Support Information

### High-Performance Type-II MIL/BiVO<sub>4</sub> Heterojunction: A Robust Photo-catalyst for Efficient Cr(VI) Detoxification

Lidan Yang,<sup>a</sup> Xu Jia,<sup>\*a</sup> Xiulian Wang,<sup>\*b</sup> Zhiqi Song,<sup>a</sup> Jiaqi Zhang,<sup>a</sup> Liuxue Zhang,<sup>\*a</sup> Jiaolong Qiao,<sup>a</sup> Genxing Zhu<sup>a</sup>

<sup>a</sup> School of Materials Electronics and Energy Storage, Zhongyuan University of Technology, Zhengzhou, 450007, PR China

<sup>b</sup> School of Smart Energy and Environment, Zhongyuan University of Technology, Zhengzhou, 450007, PR China

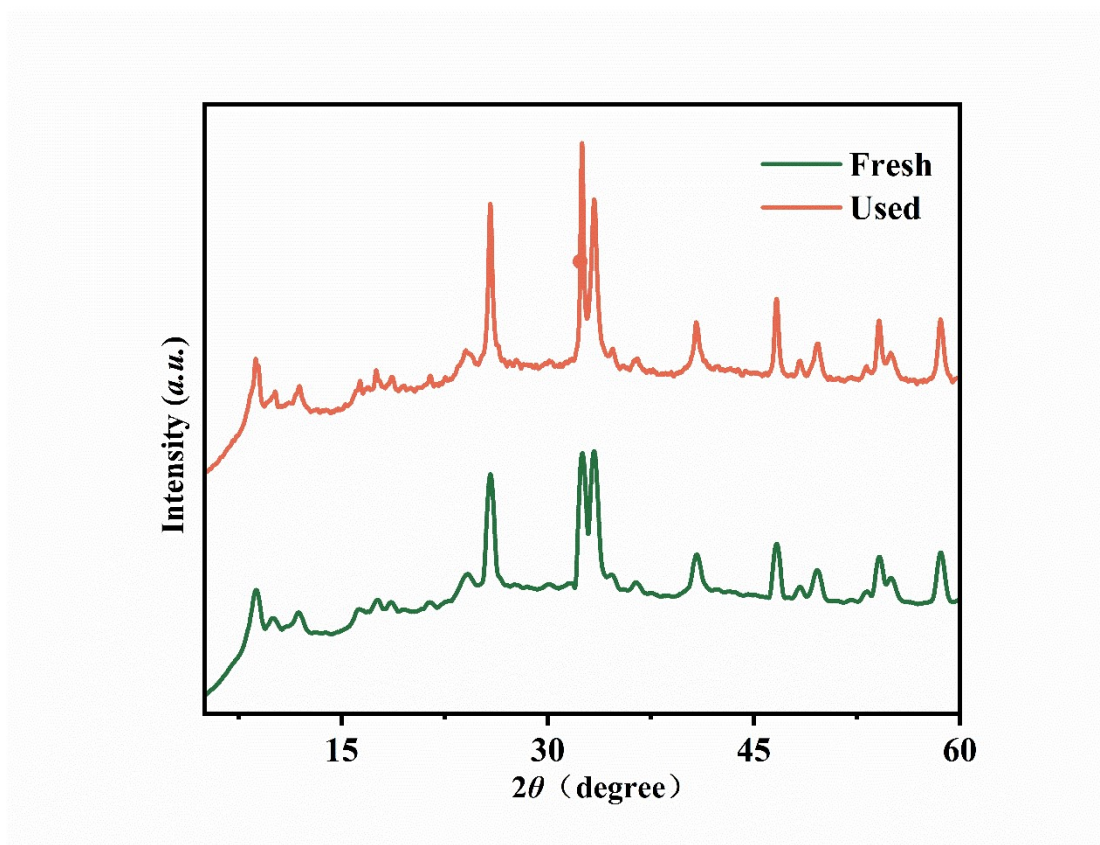

Figure S1: XRD spectra before and after the reaction of BiVO<sub>4</sub>/MIL.
